# Supplementary material for: Enhanced osteoblast functions and bactericidal effect of Ca and Ag dual-ion implanted surface layers on nanograined titanium alloys
Source: Royal Society of Chemistry journal article supplement (doi:10.1039/c4tb00124a), 2014-01-01
Supplement: c4tb00124a1.pdf [file c4tb00124a1.pdf]

## Supporting Information

### **Enhanced osteoblast functions and bactericidal effect of Ca and Ag dual-ion implanted surface layers on nanograined titanium alloy**

Run Huang<sup>1</sup>, Yong Han<sup>1</sup> \*, Shemin Lu<sup>2</sup>,

<sup>1</sup>State-key Laboratory for Mechanical Behavior of Materials, Xi'an Jiaotong

University, Xi'an 710049, China

<sup>2</sup>Department of Genetics and Molecular Biology, College of Medicine, Xi'an Jiaotong

University Xi'an 710061, China

---

\* Corresponding author. Tel./fax: +86 029 82665580.  
E-mail address: yonghan@mail.xjtu.edu.cn (Y. Han).

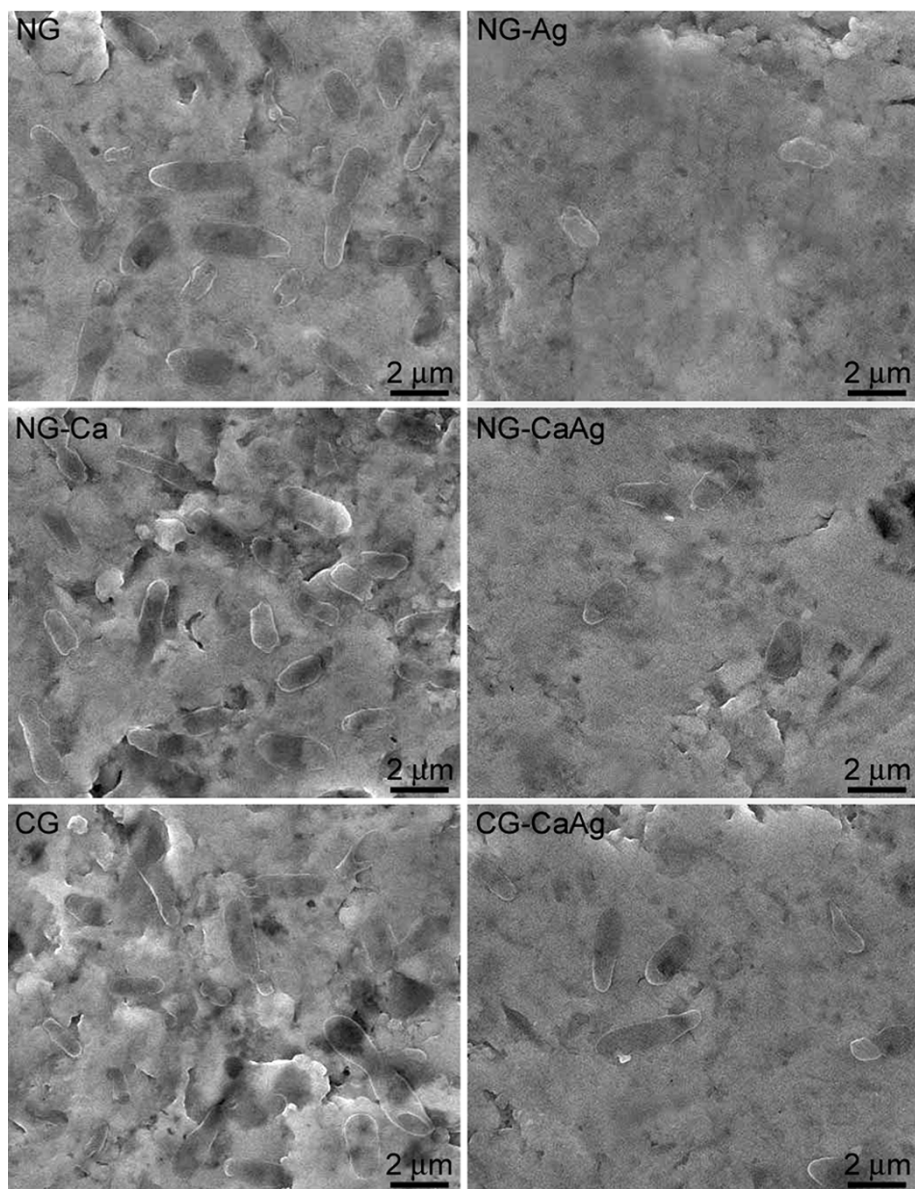

**Fig. S1.** SEM morphologies of *E. coli* cultured on the NG, NG-Ag, NG-Ca, NG-CaAg, CG and CG-CaAg surfaces for 4 h.
